# Supplementary material
Source: HighWire-hosted journal article supplement (https://bmjopen.bmj.com/content/10/10/e037388)

Supplementary figure 1: Density curves by age category for Body Mass Index. A. women, B. men

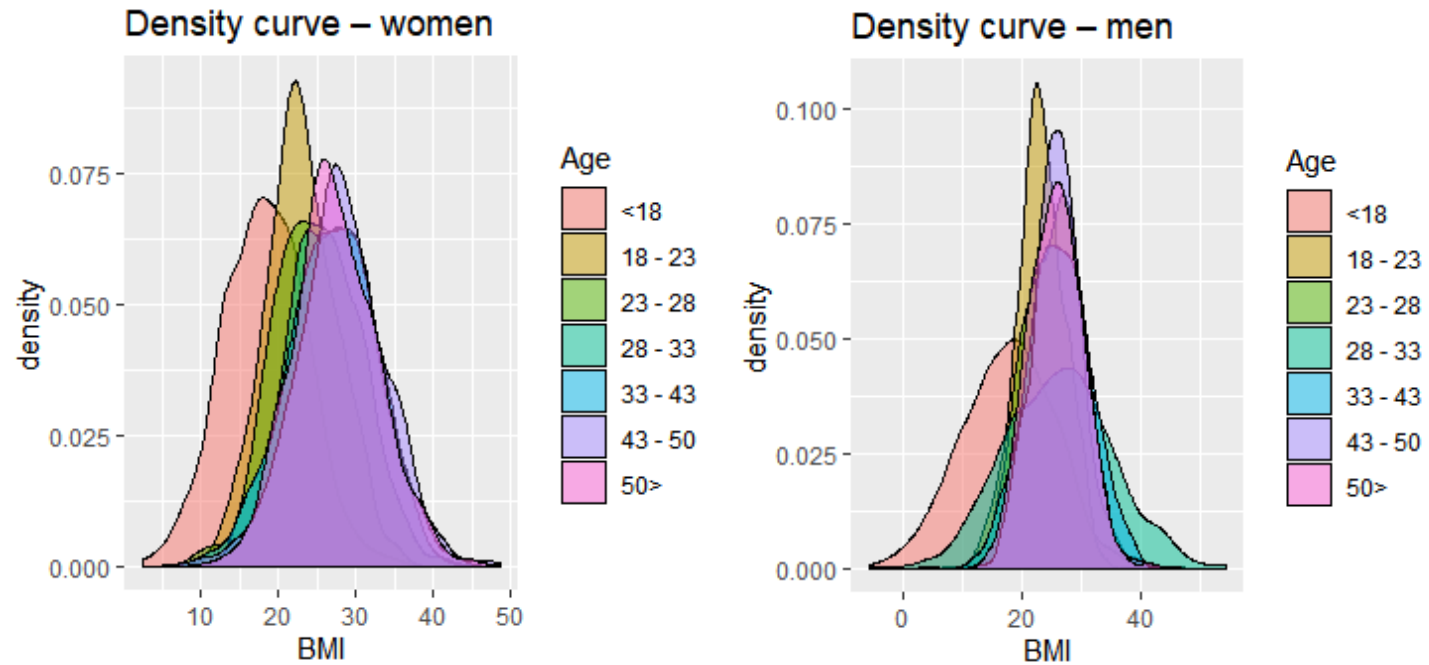

Supplement: inline-supplementary-material-1 [file inline-supplementary-material-1.pdf]
